# Supplementary material for: Elevated Plasma Levels of Ketone Bodies Are Associated With All‐Cause Mortality and Incidence of Heart Failure in Older Adults: The CHS
Source: PubMed Central journal article supplement — J Am Heart Assoc. 2023 Aug 23;12(17):e029960. doi: 10.1161/JAHA.123.029960 (PMC10547348; doi:10.1161/jaha.123.029960), 2023-08-23
Supplement: JAH3-12-e029960-s001.pdf [file JAH3-12-e029960-s001.pdf]

# **SUPPLEMENTAL MATERIAL**

**Table S1. Cluster analysis of phenotypes associated with metabolite profiles.**

|                      | Phenotype Cluster* |               |              |                    |
|----------------------|--------------------|---------------|--------------|--------------------|
|                      | A                  | B             | C            | D                  |
|                      | Healthy            | Ketone Bodies | Inflammatory | Metabolic Syndrome |
| <b>Num. of Obs.</b>  | <b>N=359</b>       | <b>N=65</b>   | <b>N=287</b> | <b>N=250</b>       |
| <b>Ketone Bodies</b> | -0.3 (0.4)         | 2.5 (1.3)     | -0.1 (0.5)   | -0.3 (0.4)         |
| <b>Pyruvate</b>      | -0.1 (0.8)         | -0.7 (0.7)    | -0.1 (0.9)   | 0.5 (1.1)          |
| <b>Citrate</b>       | -0.2 (0.9)         | 1.0 (1.0)     | 0.2 (0.9)    | -0.3 (1.0)         |
| <b>HDL</b>           | 0.7 (0.9)          | 0.4 (1.0)     | -0.3 (0.6)   | -0.7 (0.6)         |
| <b>VLDL</b>          | -0.6 (0.4)         | -0.6 (0.7)    | 0.0 (0.6)    | 1.0 (1.0)          |
| <b>LDL</b>           | -0.3 (0.8)         | -0.3 (0.9)    | 0.6 (1.0)    | -0.1 (0.9)         |
| <b>VLDL Size</b>     | 0.1 (1.1)          | 0.2 (1.3)     | -0.4 (0.6)   | 0.2 (0.7)          |
| <b>HDL Size</b>      | 0.7 (0.7)          | 0.6 (0.9)     | -0.2 (0.6)   | -1.0 (0.5)         |
| <b>LDL Size</b>      | 0.7 (0.5)          | 0.4 (0.7)     | -0.0 (0.7)   | -1.2 (0.7)         |
| <b>Triglyceride</b>  | -0.5 (0.4)         | -0.5 (0.7)    | -0.0 (0.5)   | 0.9 (1.0)          |
| <b>Cholesterol</b>   | -0.1 (0.9)         | -0.3 (0.9)    | 0.5 (1.0)    | -0.1 (1.0)         |
| <b>Basal Insulin</b> | -0.2 (0.5)         | 0.4 (2.9)     | -0.0 (0.5)   | 0.2 (1.4)          |
| <b>GlycA</b>         | -0.5 (0.7)         | -0.2 (0.9)    | 0.5 (0.9)    | -0.0 (0.9)         |
| <b>Glucose</b>       | -0.3 (0.5)         | 0.2 (1.5)     | -0.0 (0.7)   | 0.2 (1.1)          |
| <b>BMI</b>           | -0.4 (0.9)         | -0.4 (0.8)    | 0.3 (1.0)    | 0.3 (0.9)          |
| <b>eGFR</b>          | 0.4 (0.9)          | -0.3 (0.9)    | -0.3 (0.9)   | -0.1 (0.9)         |
| <b>BNP</b>           | -0.1 (0.7)         | 0.4 (1.2)     | -0.0 (0.7)   | -0.2 (0.5)         |
| <b>CRP</b>           | -0.3 (0.3)         | 0.0 (1.1)     | 0.0 (0.7)    | -0.2 (0.4)         |
| <b>IL-6</b>          | -0.4 (0.7)         | 0.7 (3.0)     | 0.3 (1.1)    | -0.1 (0.6)         |
| <b>Fibrinogen</b>    | -0.5 (0.7)         | 0.0 (0.9)     | 0.4 (0.9)    | -0.4 (0.8)         |

Data are presented as Z-score, calculated by the difference between mean divided by the standard deviation (SD). VLDL indicates very low-density lipoprotein; LDL, low-density lipoprotein; HDL, high-density lipoprotein; BNP, B-type natriuretic peptide; CRP, C-reactive protein; IL-6, interleukin 6; GlycA, glycoprotein acetylation; BMI, body mass index; and eGFR, estimated glomerular filtration rate.

\*Four clusters (A-D) were categorized using K-means clustering analysis including very low-density lipoprotein (VLDL), low-density lipoprotein (LDL), high-density lipoprotein (HDL) particle concentrations, sizes, levels of triglyceride, total cholesterol, glucose, basal insulin, B-type natriuretic peptide (BNP), C-reactive protein (CRP), interleukin-6 (IL-6), fibrinogen, glycoprotein acetylation (GlycA), as well as body mass index (BMI) and estimated glomerular filtration rate (eGFR). Data are presented as mean Z-score (SD) of each cluster.

**Table S2. Multivariate Cox Models for Overall Mortality in 20 years for ketone constituents.**

|                                | <b>Model 1*</b><br><b>HR (95% CI)</b> | <b>P</b> | <b>Model 2†</b><br><b>HR (95% CI)</b> | <b>P</b> | <b>Model 3‡</b><br><b>HR (95% CI)</b> | <b>P</b> |
|--------------------------------|---------------------------------------|----------|---------------------------------------|----------|---------------------------------------|----------|
| <b>Log (3-hydroxybutyrate)</b> | 1.2 (1.1 – 1.3)                       | <0.001   | 1.2 (1.1 – 1.3)                       | <0.001   | 1.2 (1.1 – 1.3)                       | <0.001   |
| <b>Log (Acetoacetate)</b>      | 1.1 (1.0 – 1.2)                       | 0.006    | 1.2 (1.1 – 1.3)                       | 0.004    | 1.1 (1.0 – 1.2)                       | 0.03     |
| <b>Log (Acetone)</b>           | 1.1 (1.0 – 1.2)                       | 0.04     | 1.1 (1.0 – 1.2)                       | 0.1      | 1.1 (1.0 – 1.2)                       | 0.3      |

HR indicates hazard ratio; and CI, confidence interval.

\* Model 1 is adjusted for age, age<sup>2</sup>, sex, ethnicity and clinic site.

† Model 2 is adjusted age, sex, clinic site, ethnicity, education level, kcals physical activity per week, body mass index, body mass index<sup>2</sup>, smoking status, and alcoholic drinks per week, fasting > 8 hours.

‡ Model 3 is adjusted for covariates in Model 2 and for diagnosis of hypertension, cholesterol, triglycerides, diagnosis of diabetes, estimated glomerular filtration rate, hypertension medication use, lipid-lowering medication use, and estrogen use.

**Table S3. Multivariate Cox Models for Overall Mortality in 20 years by Metabolic Phenotype Clusters.**

|                             | <b>Model 1*</b><br><b>HR (95% CI)</b> | <b>P</b> | <b>Model 2†</b><br><b>HR (95% CI)</b> | <b>P</b> | <b>Model 3‡</b><br><b>HR (95% CI)</b> | <b>P</b> |
|-----------------------------|---------------------------------------|----------|---------------------------------------|----------|---------------------------------------|----------|
| <b>Healthy</b>              | Ref                                   |          | Ref                                   |          | Ref                                   |          |
| <b>High Ketone Bodies</b>   | 1.9 (1.3 – 2.9)                       | 0.002    | 1.8 (1.1 – 2.8)                       | 0.01     | 2.0 (1.3 – 3.1)                       | 0.003    |
| <b>Chronic Inflammation</b> | 1.1 (0.8 – 1.4)                       | 0.3      | 1.0 (0.8 – 1.3)                       | 0.3      | 1.0 (0.8 – 1.3)                       | 0.9      |
| <b>Metabolic Syndrome</b>   | 0.9 (0.7 – 1.2)                       | 0.4      | 0.8 (0.6 – 1.1)                       | 0.07     | 0.9 (0.6 – 1.2)                       | 0.3      |

HR indicates hazard ratio; and CI, confidence interval.

\* Model 1 is adjusted for age, age<sup>2</sup>, sex, ethnicity, and clinic site.

† Model 2 is adjusted for covariates in Model 1 and for education level, kcals physical activity per week, smoking status, alcoholic drinks per week, and fasting > 8 hours.

‡ Model 3 is adjusted for covariates in Model 2 and dietary components: linoleic acid, oleic acid, saturated fat, carbohydrates, and protein.

**Table S4. Multivariate Cox Model for Overall Mortality in 20 Years with Logarithmic Transformed Metabolites and Metabolite Quintiles.**

|                      |                            | <b>HR (95% CI)*</b> | <b>p</b> |
|----------------------|----------------------------|---------------------|----------|
| <b>Ketone bodies</b> | <b>Log (Ketone Bodies)</b> | 1.2 (1.1 – 1.3)     | 0.002    |
|                      | <b>Quintiles: Q1</b>       | Ref                 |          |
|                      | <b>Q2</b>                  | 1.1 (0.8 – 1.5)     | 0.3      |
|                      | <b>Q3</b>                  | 1.2 (0.9 – 1.6)     | 0.3      |
|                      | <b>Q4</b>                  | 1.4 (1.0 – 1.9)     | 0.02     |
|                      | <b>Q5</b>                  | 1.5 (1.1 – 2.0)     | 0.01     |
| <b>Pyruvate</b>      | <b>Log (Pyruvate)</b>      | 1.0 (0.9 – 1.1)     | 0.8      |
|                      | <b>Quintiles: Q1</b>       | Ref                 |          |
|                      | <b>Q2</b>                  | 0.9 (0.7 – 1.2)     | 0.4      |
|                      | <b>Q3</b>                  | 0.9 (0.7 – 1.2)     | 0.3      |
|                      | <b>Q4</b>                  | 1.0 (0.7 – 1.3)     | 0.8      |
|                      | <b>Q5</b>                  | 0.9 (0.6 – 1.2)     | 0.3      |
| <b>Citrate</b>       | <b>Log (Citrate)</b>       | 1.1 (0.9 – 1.2)     | 0.4      |
|                      | <b>Quintiles: Q1</b>       | Ref                 |          |
|                      | <b>Q2</b>                  | 1.5 (1.1 – 2.0)     | 0.02     |
|                      | <b>Q3</b>                  | 1.3 (0.9 – 1.7)     | 0.1      |
|                      | <b>Q4</b>                  | 1.2 (0.9 – 1.7)     | 0.2      |
|                      | <b>Q5</b>                  | 1.3 (1.0 – 1.9)     | 0.09     |

HR indicates hazard ratio; and CI, confidence interval.

\* Adjusted for age, sex, clinic site, ethnicity, education level, kcals physical activity per week, body mass index, body mass index<sup>2</sup>, smoking status, alcoholic drinks per week, fasting > 8 hours, diagnosis of hypertension, cholesterol, triglycerides, diagnosis of diabetes, estimated glomerular filtration rate, hypertension medication use, lipid-lowering medication use, and estrogen use.

**Table S5. Cause of death prevalence within each metabolic phenotype cluster.**

| <b>Cause of death*</b>            | <b>Healthy</b> | <b>High Ketone Bodies</b> | <b>Chronic Inflammation</b> | <b>Metabolic Syndrome</b> | <b>Total</b> |
|-----------------------------------|----------------|---------------------------|-----------------------------|---------------------------|--------------|
| <b>Cardiovascular<sup>†</sup></b> | 90 (32.5%)     | 23 (35.9%)                | 109 (41.4%)                 | 80 (34.6%)                | 302          |
| <b>Cancer</b>                     | 65 (23.5%)     | 8 (12.5%)                 | 44 (16.7%)                  | 55 (23.8%)                | 172          |
| <b>Dementia</b>                   | 42 (15.2%)     | 8 (12.5%)                 | 45 (17.1%)                  | 38 (16.5%)                | 133          |
| <b>Infection<sup>‡</sup></b>      | 15 (5.4%)      | 6 (9.4%)                  | 23 (8.7%)                   | 22 (9.5%)                 | 66           |
| <b>Respiratory</b>                | 17 (6.1%)      | 2 (3.1%)                  | 10 (3.8%)                   | 11 (4.8%)                 | 40           |
| <b>Trauma</b>                     | 15 (5.4%)      | 5 (7.8%)                  | 8 (3.0%)                    | 7 (3.0%)                  | 35           |
| <b>Others<sup>§</sup></b>         | 33 (11.9%)     | 12 (18.8%)                | 24 (9.1%)                   | 18 (7.8%)                 | 87           |
| <b>Total</b>                      | 277            | 64                        | 263                         | 231                       | 835          |

\* Data presented in number of observations (percentage prevalence).

<sup>†</sup> Cardiovascular causes include coronary heart disease, stroke, or any atherosclerotic disease.

<sup>‡</sup> Infection includes pneumonia, sepsis, or any source of proven infection.

<sup>§</sup> Other causes include: Liver disease, gastrointestinal disease, renal failure, amyotrophic lateral sclerosis, Parkinson's disease, bladder disease, metabolic conditions, amyloid, failure to thrive, myelodysplastic syndrome, and musculoskeletal diseases.

**Table S6. Multivariate Cox Models for Incident Heart Failure in 20 Years by Logarithmic Transformed Ketone Bodies and Ketone Body Quintiles.**

|                      |                      | <b>Model 1*</b><br><b>HR (95% CI)</b> | <b>P</b> | <b>Model 2†</b><br><b>HR (95% CI)</b> | <b>P</b> | <b>Model 3‡</b><br><b>HR (95% CI)</b> | <b>P</b> |
|----------------------|----------------------|---------------------------------------|----------|---------------------------------------|----------|---------------------------------------|----------|
| <b>Ketone Bodies</b> | <b>Log Ketone</b>    | 1.2 (1.0 – 1.3)                       | 0.03     | 1.2 (1.0 – 1.3)                       | 0.02     | 1.2 (1.0 - 1.4)                       | 0.08     |
|                      | <b>Quintiles: Q1</b> | Ref                                   |          | Ref                                   |          | Ref                                   |          |
|                      | <b>Q2</b>            | 1.0 (0.6 – 1.4)                       | 0.7      | 0.9 (0.6 – 1.4)                       | 0.7      | 1.0 (0.6 – 1.5)                       | 0.9      |
|                      | <b>Q3</b>            | 1.0 (0.7 – 1.4)                       | 0.8      | 0.9 (0.6 – 1.4)                       | 0.7      | 0.9 (0.6 – 1.5)                       | 0.7      |
|                      | <b>Q4</b>            | 1.3 (0.9 – 1.8)                       | 0.2      | 1.2 (0.8 – 1.8)                       | 0.4      | 1.3 (0.8 – 2.0)                       | 0.3      |
|                      | <b>Q5</b>            | 1.3 (0.9 – 1.9)                       | 0.1      | 1.3 (0.9 – 2.0)                       | 0.1      | 1.2 (0.7 – 2.0)                       | 0.4      |
| <b>Pyruvate</b>      | <b>Log Pyruvate</b>  | 1.1 (1.0 – 1.3)                       | 0.1      | 1.0 (0.8 – 1.3)                       | 0.7      | 0.9 (0.8 – 1.1)                       | 0.5      |
|                      | <b>Quintiles: Q1</b> | Ref                                   |          | Ref                                   |          | Ref                                   |          |
|                      | <b>Q2</b>            | 0.9 (0.6 – 1.4)                       | 0.6      | 0.9 (0.6 – 1.3)                       | 0.4      | 0.9 (0.5 – 1.4)                       | 0.6      |
|                      | <b>Q3</b>            | 1.2 (0.8 – 1.7)                       | 0.4      | 1.2 (0.8 – 1.8)                       | 0.4      | 1.1 (0.7 – 1.8)                       | 0.6      |
|                      | <b>Q4</b>            | 0.9 (0.6 – 1.3)                       | 0.5      | 0.8 (0.5 – 1.3)                       | 0.3      | 0.8 (0.5 – 1.3)                       | 0.2      |
|                      | <b>Q5</b>            | 1.2 (0.8 – 1.9)                       | 0.3      | 1.0 (0.6 – 1.5)                       | 0.9      | 0.8 (0.5 – 1.3)                       | 0.3      |
| <b>Citrate</b>       | <b>Log Citrate</b>   | 1.0 (0.9 – 1.2)                       | 0.6      | 1.0 (0.5 – 1.9)                       | 0.9      | 0.9 (0.4 – 1.9)                       | 0.6      |
|                      | <b>Quintiles: Q1</b> | Ref                                   |          | Ref                                   |          | Ref                                   |          |
|                      | <b>Q2</b>            | 1.1 (0.8 – 1.6)                       | 0.5      | 1.1 (0.7 – 1.7)                       | 0.6      | 1.1 (0.7 – 1.8)                       | 0.6      |
|                      | <b>Q3</b>            | 1.1 (0.7 – 1.6)                       | 0.7      | 1.1 (0.7 – 1.6)                       | 0.6      | 1.2 (0.8 – 1.9)                       | 0.4      |
|                      | <b>Q4</b>            | 1.0 (0.7 – 1.5)                       | 0.9      | 1.0 (0.7 – 1.5)                       | 0.9      | 0.9 (0.6 – 1.4)                       | 0.6      |
|                      | <b>Q5</b>            | 1.1 (0.8 – 1.7)                       | 0.5      | 1.0 (0.7 – 1.6)                       | 0.8      | 1.0 (0.6 – 1.7)                       | 0.8      |

HR indicates hazard ratio; and CI, confidence interval.

\* Model 1 is adjusted for age, age<sup>2</sup>, sex, ethnicity and clinic site.

† Model 2 is adjusted age, sex, clinic site, ethnicity, education level, kcals physical activity per week, body mass index, body mass index<sup>2</sup>, smoking status, and alcoholic drinks per week, fasting > 8 hours.

‡ Model 3 is adjusted for covariates in Model 2 and for diagnosis of hypertension, cholesterol, triglycerides, diagnosis of diabetes, estimated glomerular filtration rate, hypertension medication use, lipid-lowering medication use, and estrogen use.

**Table S7. Stratified Analysis of Ketone Bodies and Incident Heart Failure by Age.**

|                        | <b>Model 1*</b><br>HR (95% CI) | <b>P</b> | <b>Model 2†</b><br>HR (95% CI) | <b>P</b> | <b>Model 3‡</b><br>HR (95% CI) | <b>P</b> |
|------------------------|--------------------------------|----------|--------------------------------|----------|--------------------------------|----------|
| <b>≤ Median Age</b>    |                                |          |                                |          |                                |          |
| <b>Log Ketone</b>      | 1.3 (1.0 – 1.7)                | 0.05     | 1.3 (1.0 – 1.8)                | 0.06     | 1.4 (1.0 – 2.1)                | 0.07     |
| <b>Quintiles: Q1</b>   | Ref                            |          | Ref                            |          | Ref                            |          |
| <b>Q2</b>              | 0.8 (0.5 – 1.3)                | 0.3      | 0.7 (0.4 – 1.3)                | 0.2      | 0.8 (0.4 – 1.4)                | 0.4      |
| <b>Q3</b>              | 0.9 (0.5 – 1.5)                | 0.6      | 0.9 (0.5 – 1.7)                | 0.8      | 1.2 (0.7 – 2.2)                | 0.5      |
| <b>Q4</b>              | 1.2 (0.7 – 2.0)                | 0.5      | 1.3 (0.7 – 2.2)                | 0.4      | 1.4 (0.7 – 2.5)                | 0.3      |
| <b>Q5</b>              | 1.3 (0.7 – 2.3)                | 0.3      | 1.2 (0.7 – 2.3)                | 0.4      | 1.3 (0.7 – 2.6)                | 0.4      |
| <b>&gt; Median Age</b> |                                |          |                                |          |                                |          |
| <b>Log Ketone</b>      | 1.2 (0.9 – 1.6)                | 0.3      | 1.2 (0.9 – 1.7)                | 0.2      | 1.2 (0.8 - 1.8)                | 0.4      |
| <b>Quintiles: Q1</b>   | Ref                            |          | Ref                            |          | Ref                            |          |
| <b>Q2</b>              | 1.1 (0.7 – 2.0)                | 0.6      | 1.2 (0.7 – 2.1)                | 0.5      | 1.4 (0.7 – 2.7)                | 0.3      |
| <b>Q3</b>              | 1.1 (0.6 – 1.8)                | 0.8      | 0.9 (0.5 – 1.7)                | 0.8      | 0.8 (0.4 – 1.9)                | 0.6      |
| <b>Q4</b>              | 1.3 (0.8 - 2.2)                | 0.3      | 1.1 (0.7 - 2.0)                | 0.6      | 1.3 (0.7 - 2.6)                | 0.4      |
| <b>Q5</b>              | 1.3 (0.8 – 2.3)                | 0.3      | 1.4 (0.8 – 2.5)                | 0.2      | 1.2 (0.6 – 2.7)                | 0.5      |

HR indicates hazard ratio; and CI, confidence interval.

\* Model 1 is adjusted for age, age<sup>2</sup>, sex, ethnicity and clinic site.

† Model 2 is adjusted age, sex, clinic site, ethnicity, education level, kcals physical activity per week, body mass index, body mass index<sup>2</sup>, smoking status, and alcoholic drinks per week, fasting > 8 hours.

‡ Model 3 is adjusted for covariates in Model 2 and for diagnosis of hypertension, cholesterol, triglycerides, diagnosis of diabetes, estimated glomerular filtration rate, hypertension medication use, lipid-lowering medication use, and estrogen use.



**Table S8. Stratified Analysis of Ketone Bodies and Incident Heart Failure by Body Mass Index.**

|                                    | <b>Model 1*</b><br>HR (95% CI) | <b>P</b> | <b>Model 2†</b><br>HR (95% CI) | <b>P</b> | <b>Model 3‡</b><br>HR (95% CI) | <b>P</b> |
|------------------------------------|--------------------------------|----------|--------------------------------|----------|--------------------------------|----------|
| <b>≤ Median Body Mass Index</b>    |                                |          |                                |          |                                |          |
| <b>Log Ketone</b>                  | 1.4 (1.0 – 1.8)                | 0.02     | 1.4 (1.1 – 1.9)                | 0.01     | 1.6 (1.1 – 2.3)                | 0.02     |
| <b>Quintiles: Q1</b>               | Ref                            |          | Ref                            |          | Ref                            |          |
| <b>Q2</b>                          | 1.1 (0.6 – 1.9)                | 0.7      | 1.2 (0.7 – 2.1)                | 0.5      | 1.2 (0.6 – 2.3)                | 0.5      |
| <b>Q3</b>                          | 1.2 (0.7 – 2.0)                | 0.6      | 1.2 (0.7 – 2.2)                | 0.5      | 1.1 (0.5 – 2.3)                | 0.7      |
| <b>Q4</b>                          | 1.3 (0.7 – 2.5)                | 0.3      | 1.4 (0.8 – 2.6)                | 0.2      | 1.6 (0.8 - 3.1)                | 0.1      |
| <b>Q5</b>                          | 1.6 (1.0 – 2.8)                | 0.07     | 1.7 (1.0 – 3.0)                | 0.04     | 1.8 (0.9 – 3.6)                | 0.08     |
| <b>&gt; Median Body Mass Index</b> |                                |          |                                |          |                                |          |
| <b>Log Ketone</b>                  | 1.1 (0.8 – 1.5)                | 0.5      | 1.1 (0.8 – 1.5)                | 0.6      | 1.0 (0.7 - 1.5)                | 0.9      |
| <b>Quintiles: Q1</b>               | Ref                            |          | Ref                            |          | Ref                            |          |
| <b>Q2</b>                          | 0.8 (0.5 – 1.4)                | 0.3      | 0.7 (0.4 – 1.2)                | 0.2      | 0.9 (0.5 – 1.5)                | 0.5      |
| <b>Q3</b>                          | 0.8 (0.5 – 1.4)                | 0.4      | 0.7 (0.4 – 1.3)                | 0.2      | 0.7 (0.4 – 1.4)                | 0.3      |
| <b>Q4</b>                          | 1.0 (0.6 - 1.8)                | 0.8      | 0.9 (0.5 - 1.6)                | 0.7      | 1.0 (0.6 – 1.9)                | 0.9      |
| <b>Q5</b>                          | 1.0 (0.6 – 1.9)                | 0.9      | 0.9 (0.5 – 1.7)                | 0.7      | 0.8 (0.4 – 1.6)                | 0.4      |

HR indicates hazard ratio; and CI, confidence interval.

\* Model 1 is adjusted for age, age<sup>2</sup>, sex, ethnicity and clinic site.

† Model 2 is adjusted age, sex, clinic site, ethnicity, education level, kcals physical activity per week, body mass index, body mass index<sup>2</sup>, smoking status, and alcoholic drinks per week, fasting > 8 hours.

‡ Model 3 is adjusted for covariates in Model 2 and for diagnosis of hypertension, cholesterol, triglycerides, diagnosis of diabetes, estimated glomerular filtration rate, hypertension medication use, lipid-lowering medication use, and estrogen use.

**Table S9. Multivariate Cox Models for Incident Heart Failure in 20 Years by Metabolite Phenotype Cluster.**

|                             | <b>Model 1*</b><br><b>HR (95% CI)</b> | <b>P</b> | <b>Model 2†</b><br><b>HR (95% CI)</b> | <b>P</b> | <b>Model 3‡</b><br><b>HR (95% CI)</b> | <b>P</b> |
|-----------------------------|---------------------------------------|----------|---------------------------------------|----------|---------------------------------------|----------|
| <b>Healthy</b>              | Ref                                   |          | Ref                                   |          | Ref                                   |          |
| <b>Ketone Bodies</b>        | 2.4 (1.3 – 4.6)                       | 0.006    | 2.2 (1.2 – 4.2)                       | 0.01     | 2.5 (1.3 – 4.8)                       | 0.04     |
| <b>Chronic Inflammation</b> | 1.4 (0.9 – 2.1)                       | 0.1      | 1.3 (0.8 – 2.0)                       | 0.2      | 1.5 (0.9 – 2.3)                       | 0.1      |
| <b>Metabolic Syndrome</b>   | 1.3 (0.8 – 2.0)                       | 0.2      | 1.2 (0.8 – 1.8)                       | 0.4      | 1.1 (0.7 – 1.8)                       | 0.6      |

HR indicates hazard ratio; and CI, confidence interval.

\* Model 1 is adjusted for age, age<sup>2</sup>, sex, ethnicity, and clinic site.

† Model 2 is adjusted for covariates in Model 1 and for education level, kcals physical activity per week, smoking status, alcoholic drinks per week, and fasting > 8 hours.

‡ Model 3 is adjusted for covariates in Model 2 and dietary components: linoleic acid, oleic acid, saturated fat, carbohydrates, and protein.

**Table S10. Lunn-Macneil Competing-Risk Estimates for Incidence of Heart Failure and All-Cause Mortality.**

|                               | <b>Univariate Model<br/>HR (95% CI)</b> | <b>P</b> | <b>Model 1*<br/>HR (95% CI)</b> | <b>P</b> |
|-------------------------------|-----------------------------------------|----------|---------------------------------|----------|
| <b>All-Cause Mortality</b>    |                                         |          |                                 |          |
| <b>Log Ketone</b>             | 1.2 (1.1 – 1.3)                         | <0.001   | 1.1 (1.0 – 1.3)                 | 0.005    |
| <b>Quintiles: Q1</b>          | Ref                                     |          | Ref                             |          |
| <b>Q2</b>                     | 1.1 (0.9 – 1.5)                         | 0.3      | 1.1 (0.9 – 1.5)                 | 0.3      |
| <b>Q3</b>                     | 1.3 (1.0 - 1.6)                         | 0.09     | 1.2 (0.9 – 1.5)                 | 0.2      |
| <b>Q4</b>                     | 1.5 (1.1 – 1.9)                         | 0.003    | 1.4 (1.1 – 1.7)                 | 0.01     |
| <b>Q5</b>                     | 1.6 (1.2 – 2.0)                         | 0.001    | 1.3 (1.0 – 1.7)                 | 0.04     |
| <b>Incident Heart Failure</b> |                                         |          |                                 |          |
| <b>Log Ketone</b>             | 1.2 (1.1 – 1.4)                         | 0.002    | 1.2 (1.0 – 1.3)                 | 0.03     |
| <b>Quintiles: Q1</b>          | Ref                                     |          | Ref                             |          |
| <b>Q2</b>                     | 1.0 (0.6 – 1.4)                         | 0.7      | 1.0 (0.6 – 1.4)                 | 0.7      |
| <b>Q3</b>                     | 1.0 (0.7 - 1.5)                         | 0.8      | 1.0 (0.7 – 1.4)                 | 0.8      |
| <b>Q4</b>                     | 1.3 (0.9 – 1.9)                         | 0.1      | 1.1 (0.9 – 1.8)                 | 0.2      |
| <b>Q5</b>                     | 1.4 (1.0 – 2.1)                         | 0.04     | 1.2 (0.9 – 1.9)                 | 0.1      |

HR indicates hazard ratio; and CI, confidence interval.

\* Model 1 is adjusted for age, sex, ethnicity, and clinic site.

**Table S11. Stratified Analysis of Ketone Bodies and Incident Heart Failure by Ejection Fraction.**

|                      | <b>Model 1*</b><br><b>HR (95% CI)</b> | <b>P</b> | <b>Model 2†</b><br><b>HR (95% CI)</b> | <b>P</b> | <b>Model 3‡</b><br><b>HR (95% CI)</b> | <b>P</b> |
|----------------------|---------------------------------------|----------|---------------------------------------|----------|---------------------------------------|----------|
| <b>HFrEF</b>         |                                       |          |                                       |          |                                       |          |
| <b>Log Ketone</b>    | 1.3 (1.1-1.6)                         | 0.001    | 1.4 (1.1-1.7)                         | 0.001    | 1.4 (1.1-1.7)                         | 0.01     |
| <b>Quintiles: Q1</b> | Ref                                   |          | Ref                                   |          | Ref                                   |          |
| <b>Q2</b>            | 1.1 (0.6-1.9)                         | 0.7      | 1.2 (0.6-2.1)                         | 0.6      | 1.1 (0.5-2.2)                         | 0.8      |
| <b>Q3</b>            | 1.0 (0.6-1.7)                         | 0.9      | 1.0 (0.6-1.8)                         | 0.9      | 1.0 (0.5-2.1)                         | 0.9      |
| <b>Q4</b>            | 1.8 (1.1-2.9)                         | 0.02     | 1.7 (1.0-2.8)                         | 0.054    | 1.6 (0.9-2.9)                         | 0.1      |
| <b>Q5</b>            | 1.9 (1.2-3.2)                         | 0.01     | 2.1 (1.2-3.6)                         | 0.007    | 1.8 (0.9-3.5)                         | 0.08     |
| <b>HFpEF</b>         |                                       |          |                                       |          |                                       |          |
| <b>Log Ketone</b>    | 1.1 (0.8-1.7)                         | 0.6      | 1.1 (0.7-1.7)                         | 0.6      | 1.1 (0.7-1.9)                         | 0.6      |
| <b>Quintiles: Q1</b> | Ref                                   |          | Ref                                   |          | Ref                                   |          |
| <b>Q2</b>            | 0.9 (0.4-2.1)                         | 0.8      | 0.9 (0.4-2.1)                         | 0.8      | 0.8 (0.4-2.0)                         | 0.6      |
| <b>Q3</b>            | 1.9 (0.9-4.0)                         | 0.07     | 1.8 (0.8-3.9)                         | 0.1      | 1.2 (0.5-2.9)                         | 0.6      |
| <b>Q4</b>            | 1.4 (0.6-3.2)                         | 0.4      | 1.3 (0.5-3.1)                         | 0.5      | 1.1 (0.4-3.3)                         | 0.8      |
| <b>Q5</b>            | 1.6 (0.7-3.7)                         | 0.2      | 1.7 (0.8-4.0)                         | 0.1      | 1.5 (0.6-3.8)                         | 0.3      |

HR indicates hazard ratio; CI, confidence interval; HFrEF, Heart Failure with Reduced Ejection Fraction; and HFpEF, Heart Failure with Preserved Ejection Fraction.

\* Model 1 is adjusted for age, age<sup>2</sup>, sex, ethnicity and clinic site.

† Model 2 is adjusted age, sex, clinic site, ethnicity, education level, kcals physical activity per week, body mass index, body mass index<sup>2</sup>, smoking status, and alcoholic drinks per week, fasting > 8 hours.

‡ Model 3 is adjusted for covariates in Model 2 and for diagnosis of hypertension, cholesterol, triglycerides, diagnosis of diabetes, estimated glomerular filtration rate, hypertension medication use, lipid-lowering medication use, and estrogen use.

**Figure S1. Cross-sectional relationships of metabolites in the Cardiovascular Health Study cohort at baseline.**

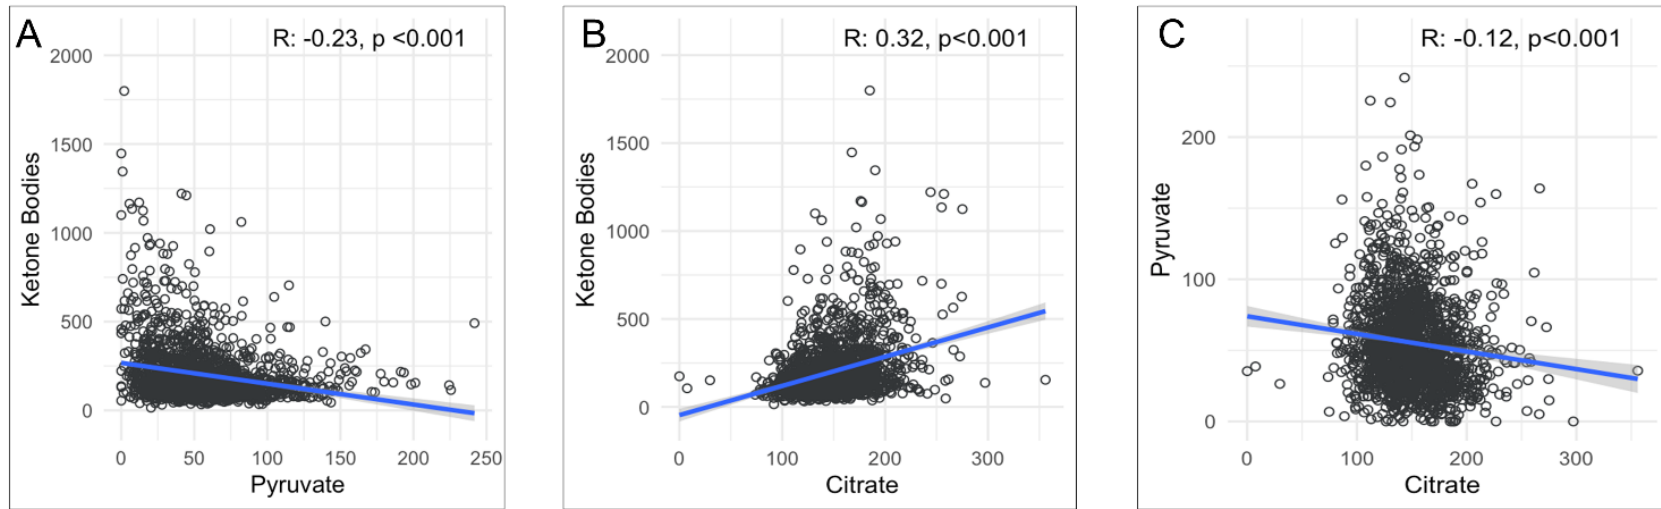

Two-way plots were generated to evaluate the cross-sectional relationship among three metabolites measured by nuclear magnetic resonance (NMR) spectroscopy: A. ketone bodies vs. pyruvate, B. ketone bodies vs. citrate, and C. pyruvate vs. citrate. The Pearson correlation coefficient (R) and p-value are shown in each plot. Each dot represents a participant in the Cardiovascular Health Study cohort.

**Figure S2. Kaplan-Meier Analysis for Overall Mortality by Metabolic Phenotypes.**

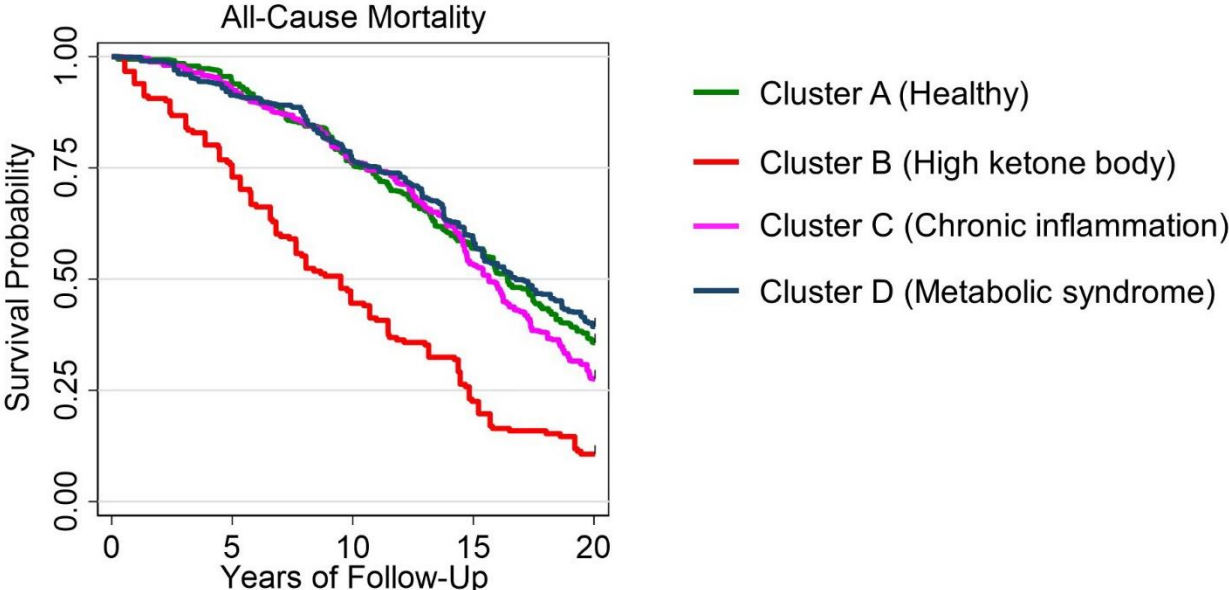

Kaplan Meier survival analysis for overall mortality by the metabolic phenotype clusters were plotted over a follow-up of 20 years. Cluster A: Healthy (green); Cluster B, high ketone bodies (red); Cluster C, chronic inflammation (magenta); and cluster D, metabolic syndrome (blue).

**Figure S3. Kaplan-Meier Estimates for 20 years for Incident Heart Failure Phenotypes for Ketone Bodies Quintiles.**

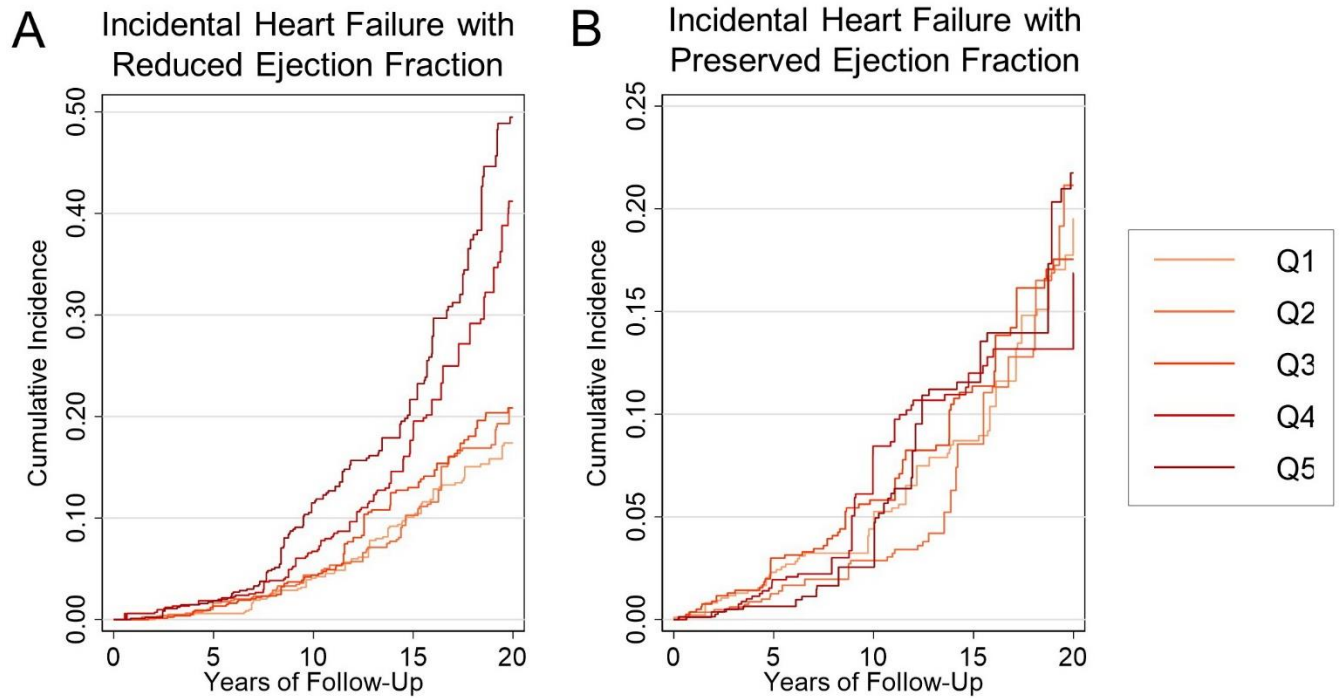

Kaplan Meier analyses are conducted for the incidence of heart failure with reduced ejection fraction (A) and preserved ejection fraction (B) by the quintiles of plasma ketone bodies.
